# Supplementary material for: Identification of candidate genes responsible for the susceptibility of apple (Malus × domestica Borkh.) to Alternaria blotch
Source: PubMed Central journal article supplement (PMC6454750; doi:10.1186/s12870-019-1737-7), 2019-04-08
Supplement: 12870_2019_1737_MOESM1_ESM.pdf [file 12870_2019_1737_MOESM1_ESM.pdf]

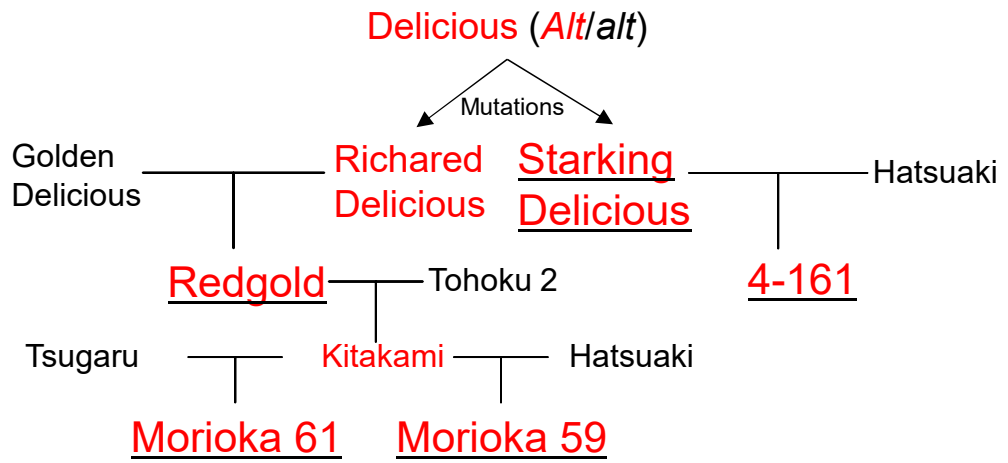

Fig. S1 Graphical representation of pedigree of apple accessions used for development of experimental populations. Apples shown in red are susceptible to Alternaria blotch. Underlined apples are used as crossing parents for experimental populations.
