# Supplementary material for: Identification of candidate genes responsible for the susceptibility of apple (Malus × domestica Borkh.) to Alternaria blotch
Source: PubMed Central journal article supplement (PMC6454750; doi:10.1186/s12870-019-1737-7), 2019-04-08
Supplement: 12870_2019_1737_MOESM2_ESM.pdf [file 12870_2019_1737_MOESM2_ESM.pdf]

Table S1 Mapping results of SSR markers used in marker enrichment analysis

| Markers      | Amplification |
|--------------|---------------|
| Mdo.chr11.1  | Np            |
| Mdo.chr11.2  | Np            |
| Mdo.chr11.3  | Ok            |
| Mdo.chr11.4  | Na            |
| Mdo.chr11.5  | Ok            |
| Mdo.chr11.6  | Ok            |
| Mdo.chr11.7  | Na            |
| Mdo.chr11.8  | Np            |
| Mdo.chr11.9  | Ok            |
| Mdo.chr11.10 | Ok            |
| Mdo.chr11.11 | Ok            |
| Mdo.chr11.12 | Ok            |
| Mdo.chr11.13 | Np            |
| Mdo.chr11.14 | Ok            |
| Mdo.chr11.15 | Np            |
| Mdo.chr11.16 | Ok            |
| Mdo.chr11.17 | Np            |
| Mdo.chr11.18 | Np            |
| Mdo.chr11.19 | Np            |
| Mdo.chr11.20 | Other         |
| Mdo.chr11.21 | Other         |
| Mdo.chr11.22 | Ok            |
| Mdo.chr11.23 | Np            |
| Mdo.chr11.24 | Np            |
| Mdo.chr11.25 | Ok            |
| Mdo.chr11.26 | Na            |
| Mdo.chr11.27 | Ok            |
| Mdo.chr11.28 | Ok            |
| Mdo.chr11.29 | Other         |
| Mdo.chr11.30 | Ok            |
| Mdo.chr11.31 | Na            |
| Mdo.chr11.32 | Na            |
| Mdo.chr11.33 | Na            |
| Mdo.chr11.34 | Ok            |
| Mdo.chr11.35 | Ok            |
| Mdo.chr11.36 | Na            |
| Mdo.chr11.37 | Ok            |
| Mdo.chr11.38 | Ok            |
| Mdo.chr11.39 | Ok            |
| Mdo.chr11.40 | Np            |
| Mdo.chr11.41 | Ok            |
| Mdo.chr11.42 | Np            |
| Mdo.chr11.43 | Other         |
| Mdo.chr11.44 | Ok            |
| Mdo.chr11.45 | Np            |

Ok: mapped on LG11

Np: not polymorphic

Na: not amplified

Other: mapped on other LG
