# Supplementary material for: Identification of candidate genes responsible for the susceptibility of apple (Malus × domestica Borkh.) to Alternaria blotch
Source: PubMed Central journal article supplement (PMC6454750; doi:10.1186/s12870-019-1737-7), 2019-04-08
Supplement: 12870_2019_1737_MOESM3_ESM.pdf [file 12870_2019_1737_MOESM3_ESM.pdf]

Table S2 Graphical illustration of genotypes of individuals showing recombination between *Alt* and flanking markers

| Markers/Trait                                              | Mdo.chr1.27 | Mdo.chr1.28 | 3_34-12 (288bp) | Mdo.chr1.3 | Mdo.chr1.33m | 3_34-12 (252bp) | Phenotype | 3-34-18 | Mdo.chr1.34 | Mdo.chr1.35 | Mdo.chr1.5 | Mdo.chr1.38 | Mdo.chr1.39 | Mdo.chr1.41 | Mdo.chr1.44 |
|------------------------------------------------------------|-------------|-------------|-----------------|------------|--------------|-----------------|-----------|---------|-------------|-------------|------------|-------------|-------------|-------------|-------------|
| Origin of SSR in apple genome version 1.0 primary assembly | 2903kb      | 2915kb      | (3156kb)        | 3064kb     | 3157kb       | 3156kb          |           | 3160kb  | 3166kb      | 3201kb      | 3527kb     | 3564kb      | 3610kb      | 3670kb      | 3952kb      |
| <i>Alt</i> (susceptibility) associated alleles (bp)        | 261         | 278         | 288             | 223        | 267          | 252             |           | 299     | 288         | 251         | 178        | 373         | 397         | 305         | 173         |
| Number of recombinants with <i>Alt</i>                     | 4           | 4           | 3               | 2          | 1            | 0               |           | 0       | 1           | 2           | 3          | 5           | 6           | 11          | 19          |

  

| Plant ID   | Genotype | Phenotype |
|------------|----------|-----------|
| JSD_26     | S        | S         |
| JSD_32     | S        | S         |
| P13_7-3806 | mn       | S         |
| P2_23      | S        | S         |
| P7_7-2058  | mn       | S         |
| P4_14      | S        | S         |
| P3_2       | S        | S         |
| P13_7-3743 | mn       | S         |
| P13_7-3693 | mn       | R         |
| P13_7-3709 | mn       | R         |
| JSD_45     | R        | R         |
| P4_5       | R        | R         |
| P6_7-49    | mn       | R         |
| P10_7-3141 | R        | R         |
| P1_38      | R        | R         |
| P2_10      | R        | R         |
| P4_37      | R        | R         |
| P11_7-3284 | mn       | R         |
| P1_35      | R        | R         |
| P7_7-2120  | mn       | R         |
| P6_7-50    | mn       | R         |
| P13_7-3799 | mn       | R         |
| P3_1       | S        | S         |

mn indicates allele that was not identify whether the origin was susceptible or resistant parent.
