# Supplementary material for: Identification of candidate genes responsible for the susceptibility of apple (Malus × domestica Borkh.) to Alternaria blotch
Source: PubMed Central journal article supplement (PMC6454750; doi:10.1186/s12870-019-1737-7), 2019-04-08
Supplement: 12870_2019_1737_MOESM4_ESM.pdf [file 12870_2019_1737_MOESM4_ESM.pdf]

|                |     |                                                      |     |
|----------------|-----|------------------------------------------------------|-----|
| ORF_A6         | 1   | MALGEVFLGAFLLQLLLDRLTPREILEYFGNFRGVGQKLEKWRITLSTIGA  | 50  |
|                |     | .                  .                                 |     |
| XP_009379454.1 | 1   | MALGEVFLAAFLQLLLDRLTPREILEYFGNFRGVGQKLEKWRITLSTIGA   | 50  |
| ORF_A6         | 51  | VLSDAEERQLTEGGVKLWLHDLRDLAYDIEDMLDKFAIQMLKRMIEGRDQ   | 100 |
|                |     | .                  .                                 |     |
| XP_009379454.1 | 51  | VLSDAEERQLTEGGVKLWLDDLRLAYDIEDMLDKFATQMLKRMIEGRDQ    | 100 |
| ORF_A6         | 101 | GTSRK                                                | 106 |
|                |     | . .                                                  |     |
| XP_009379454.1 | 101 | ASPSRKVRRSFYKVKLSFDMNSEMKKITKRLQDISERKDFGLKDTG TSA   | 150 |
| ORF_A6         | 107 | -----                                                | 106 |
| XP_009379454.1 | 151 | KESRSLPSSDVLDEKLVVGRDGDGKGI IELLSRKYEHADAVNFGVVAIVG  | 200 |
| ORF_A6         | 107 | -----                                                | 106 |
| XP_009379454.1 | 201 | MAGVGKTTLAQLVFNNKDDAMKDIELKVVWSVSDDFVVRVTKAILESIT    | 250 |
| ORF_A6         | 107 | RP                                                   | 108 |
|                |     |                                                      |     |
| XP_009379454.1 | 251 | SRPVQVEEF SKMQHDLSEQLRGKKFLIVLDDIWDKDDYDL YDLWTRLQSP | 300 |
| ORF_A6         | 109 | -----                                                | 108 |
| XP_009379454.1 | 301 | FGVGAGGSKIIVTTRDRNVAKITGAAGVHNLECMADDDCMEIFERHAFGE   | 350 |
| ORF_A6         | 109 | -----                                                | 108 |
| XP_009379454.1 | 351 | INNGKPVNYEVIRTKIVGKCCGLPLAARTLGGLRRQEKEEWGEILDNKL    | 400 |
| ORF_A6         | 109 | -----                                                | 108 |
| XP_009379454.1 | 401 | WNLADKSGLLPVLKLSYHYLPSHLKRCFAYCSILPNDYEFGEKQLVLLWM   | 450 |
| ORF_A6         | 109 | -----                                                | 108 |
| XP_009379454.1 | 451 | AEGLIQQKHDDNKQMEDLGRDYFRELLARSLFQESSKNNSRYVMHDLVND   | 500 |
| ORF_A6         | 109 | -----                                                | 108 |
| XP_009379454.1 | 501 | LARWAAGEICFRLEDKQGDNLGSTCFRRARHSSF IAGGFDGVMRFEDFPK  | 550 |
| ORF_A6         | 109 | -----                                                | 108 |
| XP_009379454.1 | 551 | AERLRTSLPLSLSDSRGWYKYL SRKVTFELLPQLQYLRVLSFNQYRITEL  | 600 |

|                |      |                                                            |      |
|----------------|------|------------------------------------------------------------|------|
| ORF_A6         | 109  | -----                                                      | 108  |
| XP_009379454.1 | 601  | <b>PKSIGDLRLQLYLDLSYTLITSLPKSTSTLYYLQTLILEGCDELKSLPVN</b>  | 650  |
| ORF_A6         | 109  | -----                                                      | 108  |
| XP_009379454.1 | 651  | <b>MSNLIKLRHLNNSGASSLEGMPLQLGRLTNLQSLPLFVASEGSDQSGIRE</b>  | 700  |
| ORF_A6         | 109  | -----                                                      | 108  |
| XP_009379454.1 | 701  | <b>IGPLLHLRGALCLSRLENTDVEDARRANLKCKERLDSL VLEWSRSRDR</b>   | 750  |
| ORF_A6         | 109  | -----                                                      | 108  |
| XP_009379454.1 | 751  | <b>ETESTVLDMLQPHTKIKELTIKRYAGKEFSSWVGGFFSNMVLVRLEECN</b>   | 800  |
| ORF_A6         | 109  | -----                                                      | 125  |
|                |      | <b>GECILPFPLLEILEFLD</b>                                   |      |
|                |      | : .       :                                                |      |
| XP_009379454.1 | 801  | <b>NCLLLPPLGQLPHLKELYIRGMNAVESVGPEFYGECVLAFFLLEILEFVD</b>  | 850  |
| ORF_A6         | 126  | <b>KQHWKVVLPFQLDHGSGCFCLKRLSIKECSKLE</b> -----             | 159  |
|                |      | .       :                                                  |      |
| XP_009379454.1 | 851  | <b>MQHWKVVLPFQLDHGSGVFPCLKRLSIKKCSKLEGKLPENLDLLAKLEIV</b>  | 900  |
| ORF_A6         | 160  | -----                                                      | 180  |
|                |      | <b>DAKVEFELLEYLCLSNISEVM</b>                               |      |
|                |      | :     . .                                                  |      |
| XP_009379454.1 | 901  | <b>ECEELAVSIVNYKQLRQLNIKGCKLVHTDAEVEFELLESRLSNISEVM</b>    | 950  |
| ORF_A6         | 181  | <b>SLETGELFRKGLSKVTYLIKISGCEKLMSSFKNEARLLQQLTSLGRLEIEG</b> | 230  |
|                |      | :    .       .  :    .  :   .    :       .                 |      |
| XP_009379454.1 | 951  | <b>SLQTGELLRKGLSKVRDLKINGCEKLTSSWKNEGRLLQRLTSLGRLEIED</b>  | 1000 |
| ORF_A6         | 231  | <b>NSRLVEELGEEAEELLQLQILECKLKFEELNKCENLVKLPKGLNQLSSLQ</b>  | 280  |
|                |      | :    : : .    :                                            |      |
| XP_009379454.1 | 1001 | <b>NSRLVEELGEEAEELLQLQILECKLEFLQLKGCENLLKLPKGLNQLSSLQ</b>  | 1050 |
| ORF_A6         | 281  | <b>ELCIHECSSLVSPFDVGLPSSLKNIKIRKCDSLIYFAKQIPQNLKIIDI</b>   | 330  |
|                |      | .  :       : : .  : .       : :                            |      |
| XP_009379454.1 | 1051 | <b>ELRIYECSSLVSPFDVGLPSSLKDIDIRRHSLIYFAKQIPQNLRRINI</b>    | 1100 |
| ORF_A6         | 331  | <b>GDCKSLKSLVDEEECERLGLIAPNGFFSDNTNHCLECIDMFGCQNLKSLP</b>  | 380  |
|                |      | .:       :       :       . .:.                             |      |
| XP_009379454.1 | 1101 | <b>ENCKSLKSLVDEEECERVGLIAPNGFFNDNTNHCLEYIQIWNCGQNLKSLP</b> | 1150 |
| ORF_A6         | 381  | <b>DGLCHLSNLQELDIRECGSLVSI LRLSGGRRPSNLIQIHIENCEKFEALP</b> | 430  |
|                |      | . .  :      .       . . . . . .                            |      |
| XP_009379454.1 | 1151 | <b>DGLCHLSNLQTLIIGDCGSLVSI PRLSGGRRPSNLRWIVI---WKLVALP</b> | 1197 |

|                |      |                                                     |      |
|----------------|------|-----------------------------------------------------|------|
| ORF_A6         | 431  | EDMHNLSLETLSIDYREGLIFPPNLTSLVIWKVKS                 | 467  |
|                |      | .  .      .      .      .                           |      |
| XP_009379454.1 | 1198 | EDMHNLSLEELRIDYREGLTFPPNLTSLTIWKVKSCKSLWELEWGLQRL   | 1247 |
| ORF_A6         | 468  | -----PDTVSFPPNMVRMETLLPKSLTRLVINDFPNLKKLSSEGFQ      | 508  |
|                |      | :       .  : .      : :                             |      |
| XP_009379454.1 | 1248 | TSLIIYGEDPDTVSFPPDMVRMETLLPKSLTELIIVGFPNLKKLSSKGFE  | 1297 |
| ORF_A6         | 509  | FLTSLQYLGLWNCPKLASIPEEGLPPSLEELWIYGCPVLKERCQPGKGRY  | 558  |
|                |      | .  .  .      .      .   .                           |      |
| XP_009379454.1 | 1298 | FLTSLQSLQLSKCPKLASIPPEESLPPSLEELSIYRCPVLKERCQPGKGRY | 1347 |
| ORF_A6         | 559  | WHKISHIPYIRIDDKEYSEDENEQKRYINGIAYFLSFHGHVFWFFIKNG   | 608  |
|                |      | .  .   . :.                                         |      |
| XP_009379454.1 | 1348 | WHKISHIPCILIDCQPI-----                              | 1364 |
| ORF_A6         | 609  | FAAFINHRQSFDNVILSAPIEEHAGEVKFEAMVSSLPKEIVCDILLRLP   | 658  |
| XP_009379454.1 | 1365 | -----                                               | 1364 |
| ORF_A6         | 659  | PKALIRCTSVSKPWNSMIKNPSVVHHLRHTIDFNQFGTHLLLRDNPVE    | 708  |
| XP_009379454.1 | 1365 | -----                                               | 1364 |
| ORF_A6         | 709  | QNYYLHLDNHAFDEYCKLEYPSVSKRNRFRVYSLARGLWSSPRSFDP     | 758  |
| XP_009379454.1 | 1365 | -----                                               | 1364 |
| ORF_A6         | 759  | WCSLNDGRYQNFILAIDVSDGNSIAMFTTTRGRNCPEDFLDIWVMKEYG   | 808  |
| XP_009379454.1 | 1365 | -----                                               | 1364 |
| ORF_A6         | 809  | IEDSWAKLITLKSTGSGKKGALQALMF                         | 835  |
| XP_009379454.1 | 1365 | -----                                               | 1364 |

Purple: RX-CC\_like

Yellow: NB-ARC

Blue: Leucine-rich repeat domain superfamily

Red: F-box domain

Fig. S2 Pairwise alignment of deduced amino acid sequences between A6, a predicted ORF within *Alt* region, and XP\_009379454.1.1, the gene most similar to A6, as revealed by a database search. Alignment was performed using Needle.
