# Supplementary material for: Identification of candidate genes responsible for the susceptibility of apple (Malus × domestica Borkh.) to Alternaria blotch
Source: PubMed Central journal article supplement (PMC6454750; doi:10.1186/s12870-019-1737-7), 2019-04-08
Supplement: 12870_2019_1737_MOESM5_ESM.pdf [file 12870_2019_1737_MOESM5_ESM.pdf]

a2 MPLGEVFLAAFLQLLLDRLTPRDILNYFGNFRGVGKKLEKWRATLTTIAAVLSDADERQR 60  
G14 MPLGEVFLAAFLQLLLDRLTPRDILNYFGNFRGVGKKLEKWRATLTTIAAVLSDADERQR 60  
A8 MPLGEVFLAAFLQLLLDRLTPRDILNYFGNFRGVGKKLEKWRATLSTIAAVLSDADERQR 60  
\*\*\*\*\*:\*\*\*\*\*  
a2 TDDAVKLWLNLRDLAYDVEDMLDKFATQMLKRTIEGRDQASTSNKVRNSLFKIKLNWNM 120  
G14 TDDAVKLWLNLRDLAYDVEDMLDKFATQMLKRTIEGRDQASTSNKVRNSLFKIKLNWNM 120  
A8 TDDAVKLWLNLRDLAYDVEDMLDKFATQMLKRTIEGRDQASTSNKVRNSLFKIKLNWDM 120  
\*\*\*\*\*:  
a2 NSEMKKITERLQDISDRKVKFSLKDTGTSAKESRSLPCSGVLDEKLLVGRDGDGKGI IEL 180  
G14 NSEMKKITERLQDISDRKVKFSLKDTGTSAKESRSLPCSGVLDEKLLVGRDGDGKGI IEL 180  
A8 NSEMKKITERLQDISDRKVKFGLKDTGTSAKESRSLPSSCVLDEKLVGRDGDGKGI IEL 180  
\*\*\*\*\*.\*\*\*\*\*. \* \*\*\*\*\*:\*\*\*\*\*  
a2 LKKSTNFGVVAIVGMPGVGKTTLAQLVFNNKDDAMKEFELKVWVSVSDDFDVVRVTKA I L 240  
G14 LKKSTNFGVVAIVGMPGVGKTTLAQLVFNNKDDAMKEFELKVWVSVSDDFDVVRVTKA I L 240  
A8 LKKSTNFGVVAIVGMPGVGKTTLAQLVFNNKDDAMKEFELKVWVSVSDDFDVVRVTKA I L 240  
\*\*\*\*\*  
a2 ESMKPLPVQVEEFSKMQHDLSEQLRGKKFLIVLDDVWNGDRDLNDLWLRKSPFGVGAG 300  
G14 ESMKPLPVQVEEFSKMQHDLSEQLRGKKFLIVLDDVWNGDRDLNDLWLRKSPFGVGAG 300  
A8 ESMKPLPVQVEEFSKMQHDLSEQLRGKKFLIVLDDVWNGDRDLNDLWLRKSPFGVGAG 300  
\*\*\*\*\*  
a2 GSKIIVTTRDLNVAKIMGATGFHNLECMANDDCLEIFERHAFGEVNSGKPVNYELIRTKI 360  
G14 GSKIIVTTRDLNVAKIMGATGFHNLECMANDDCLEIFERHAFGEVNSGKPVNYELIRTKI 360  
A8 GSKIIVTTRDLNVAKIMGATGFHNLECMANDDCLEIFERHAFGEVNSGKPVNYELIRTKI 360  
\*\*\*\*\*  
a2 VEKCCGLPLAARTLGGLLRCKETDEWGEILDNKLWNLADNCNLPRVLELSYHYLPSHLKR 420  
G14 VEKCCGLPLAARTLGGLLRCKETDEWGEILDNKLWNLADNCNLPRVLELSYHYLPSHLKR 420  
A8 VEKCCGLPLAARTLGGLLRCKETDEWGEILDNKLWNLADNCNLPRVLELSYHYLPSHLKR 420  
\*\*\*\*\*  
a2 CFAYCSILPNDYEFGEKQLVLLWMAEGLIQKPDNNKQMEDLGRDYFRELLARSLFQESS 480  
G14 CFAYCSILPNDYEFGEKQLVLLWMAEGLIQKPDNNKQMEDLGRDYFRELLARSLFQESS 480  
A8 CFAYCSILPNDYEFGEKQLVLLWMAEGLIQKPDNNKQMEDLGRDYFRELLARSLFQESS 480  
\*\*\*\*\*:\*\*\*\*\*  
a2 KNNSRYVMHDLVSELTRWAAGEICFRLEDKQGDNLQSTCFRGARHSSF IAGEFDGVKRFE 540  
G14 KNNSRYVMHDLVSELTRWAAGEICFRLEDKQGDNLQSTCFRGARHSSF IAGEFDGVKRFE 540  
A8 KNNSRYVMHDLVSELTRWAAGEICFRLEDKQGDNLQSTCFRGARHSSF IAGEFDGVKRFE 540  
\*\*\*\*\*

a2 DFPKAERLRTFLPLSLSYSTGWLKFLSRQVTFKLLPQLQYLRVLSFN DYKITALPESIGD 600  
G14 DFPKAERLRTFLPLSLSYSTGWLKFLSRQVTFKLLPQLQYLRVLSFN DYKITALPESIGD 600  
A8 DFPKAERLRTFLPLSLSYSTGWLKFLSRQVTFKLLPQLQYLRVLSFN DYKITALPESIGD 600

\*\*\*\*\*

a2 LRLQYLDLSYTYITSLPKSISTLYNLQTLILEHCYLLKSL LADMSNLINLRHLNNSYVS 660  
G14 LRLQYLDLSYTYITSLPKSISTLYNLQTLILEHCYLLKSL LADMSNLINLRHLNNSYVS 660  
A8 LRLQYLDLSYTYITSLPKSISTLYNLQTLILEHCYLLKSL LADMSNLINLRHLNNSYVS 660

\*\*\*\*\*

a2 SLEGMPNLSLVNLQSLPNFVVS GSGDQSGIREIGPLSHLRGTLCSIGLE NVTDVEDAR 720  
G14 SLEGMPNLSLVNLQSLPNFVVS GSGDQSGIREIGPLSHLRGTLCSIGLE NVTDVEDAR 720  
A8 SLEGMPNLSLVNLQSLPNFVVS GSGDQSGIREIGPLSHLRGTLCSIGLE NVTDVEDAR 720

\*\*\*\*\*

a2 RANLKCKERLDSLVLKWSHSSDTRETESVLDML EPHTKLKELTIKSYAGEEFSSWVGGP 780  
G14 RANLKCKERLDSLVLKWSHSSDTRETESVLDML EPHTKLKELTIKSYAGEEFSSWVGGP 780  
A8 RANLKCKERLDSLVLKWSHSSDTRETESVLDML EPHTKLKELTIKSYAGEEFSSWVGGP 780

\*\*\*\*\*

a2 LFSNMVLVCLQKCNCLSLPPLGQLPHLRELYISGMNAVESVGA EYGERMLPFPVLETL 840  
G14 LFSNMVLVCLQKCNCLSLPPLGQLPHLRELYISGMNAVESVGA EYGERMLPFPVLETL 840  
A8 LFSNMVLVCLQKCNCLSLPPLGQLPHLRELYISGMNAVESVGA EYGERMLPFPVLETL 840

\*\*\*\*\*

a2 EFVEMQHWKEWLPFQADHEGGAFPCLTLLVKKCSKLEGLPENL NSLAKLKIVECEELV 900  
G14 EFVEMQHWKEWLPFQADHEGGAFPCLTLLVKKCSKLEGLPENL NSLAKLKIVECEELV 900  
A8 EFVEMQHWKEWLPFQADHEGGAFPCLTLLVKKCSKLEGLPENL NSLAKLKIVECEELV 900

\*\*\*\*\*

a2 VSIANCKQLRQLNIDGCKVLVHTAAKVEFELLESCLSNISEMMSLQTGELLK KGLTKVR 960  
G14 VSIANCKQLRQLNIDGCKVLVHTAAKVEFELLESCLSNISEMMSLQTGELLK KGLTKVR 960  
A8 VSIANCKQLRQLNIDGCKVLVHTAAKVEFELLESCLSNISEMMSLQTGELLK KGLTKVR 960

\*\*\*\*\* \*\*\*\*\*

a2 DLKISGCEELTSSLKNEGRLLQQLTSLGSLEIEDNSR LVEELGKEAEELQISECKLEFL 1020  
G14 DLKISGCEELTSSLKNEGRLLQQLTSLGSLEIEDNSR LVEELGKEAEELQISECKLEFL 1020  
A8 DLKISGCEELTSSLKNEGRLLQQLTSLGSLEIEDNSR LVEELGKEAEELQISECKLEFL 1020

\*\*\*\*\* : \*\*\*\*\* : \*\*\*\*\* : \*\*\*\*\*

a2 ELKCCENLSKLLKGLNQLSSLQELRIHECSSLVSPDVGLPSLKD IQITSCDSL IYFAKF 1080  
G14 ELKCCENLSKLLKGLNQLSSLQELRIHECSSLVSPDVGLPSLKD IQITSCDSL IYFAKF 1080  
A8 ELKCCENLSKLLKGLNQLSSLQELRIHECSSLVSPDVGLPSLKD IQITSCDSL IYFAKF 1080

\*\*\*\*\*

```

a2      QIPQNLRRTEIKDCKSLKSLVDEEAVSSSWSSFHSCLEYLRIRGCESLTSLSLSGQLPR 1140
G14     QIPQNLRRTEIKDCKSLKSLVDEEAVGSSWSSFHSCLEYLRIRGCESLMSLSLSGQLPR 1140
A8      QIPQNLRRTEIKDCKSLKSLVDEEAVGSSWSSFHSCLEYLRIRGCESLMSLSLSGQLPR 1140
*****

a2      TLKHLLENCDRLEL IAGDGFFRDNTNDCLEYIRIWNQCQLKSLPDGLCHLSNLQTLGIG 1200
G14     TLKHLLENCDRLEL IAGDGFFRDNTNDCLEYIRIWNQCQLKSLPDGLCHLSNLQTLGIG 1200
A8      TLKHLLENCDRLEL IAGDGFFRDNTNDCLEYIRIWNQCQLKSLPDGLCHLSNLQTLGIG 1200
*****

a2      NCGSLVSI PRLSGGRRPSNLRKIWI IGCNKLEALPEDMHNLNSLEELSIDYREGLTFPPN 1260
G14     NCGSLVSI PRLSGGRRPSNLRKIWI IGCNKLEALPEDMHNLNSLEELSIDYREGLTFPPN 1260
A8      NCGSLVSI PRLSGGRRPSNLRKIWI IGCNKLEALPEDMHNLNSLEELSIDYREGLTFPPN 1260
*****

a2      LTSLEIGKVKSCSKSLWELEWGLHRLTSLRELGIRSTDPDTSFPPDMVRMETLFPKSLTN 1320
G14     LTSLEIGKVKSCSKSLWELEWGLHRLTSLRELGIRSTDPDTSFPPDMVRMETLFPKSLTN 1320
A8      LTSLEIGKVKSCSKSLWELEWGLHRLTSLRELGIRSTDPDTSFPPDMVRMETLFPKSLTN 1320
*****

a2      LSIDGFPNLKKLSSKGFQFLTSLQSLDLSNCPKLASIPPEGLPPSLERLTIYECVVKER 1380
G14     LSIDGFPNLKKLSSKGFQFLTSLQSLDLSNCPKLASIPPEGLPPSLERLTIYECVVKER 1380
A8      LSIDGFPNLKKLSSKGFQFLTSLQSLDLSNCPKLASIPPEGLPPSLERLTIYECVVKER 1380
*****

a2      CQPGKGRYWHKISHIPFIWIDYKQM 1405
G14     CQPGKGRYWHKISHIPFIWIDYKQM 1405
A8      CQPGKGRYWHKISHIPFIWIDYKQM 1405
*****

```

**Purple**: RX-CC\_like

**Yellow**: NB-ARC

**Blue**: Leucine-rich repeat domain superfamily

Fig. S3 Amino acid sequence alignment of predicted ORFs of A8, a2 and G14. Alignment was performed using ClustalW 2.1.
