# Supplementary material for: Identification of candidate genes responsible for the susceptibility of apple (Malus × domestica Borkh.) to Alternaria blotch
Source: PubMed Central journal article supplement (PMC6454750; doi:10.1186/s12870-019-1737-7), 2019-04-08
Supplement: 12870_2019_1737_MOESM6_ESM.pdf [file 12870_2019_1737_MOESM6_ESM.pdf]

```

A10      MSQKLTNRKFEKGRPLPKFGEWDVNDPASAEGFTVIFNKARDEKKTGGKPESPGKVDPN 60
G16      MSQKLTNRKFEKGRPLPKFGEWDVNDPASAEGFTVIFNKARDEKKTGGKPESPGKVDPN 60
a4       MSQKLTNRKFEKGRPLPKFGEWDVNDPASAEGFTVIFNKARDEKKTGGKPESPGKVDPN 60
          *****
          *****
          *****

A10      IRHGGGVDPGTGRPSSESRFTCKSQFNAYAQKHKGARIEVLDSGHPKLPTEKAAKWEN 120
G16      IRHGGGVDPGTGRPSSESRFTCKSQFNAYAQKHKGARIEVLDSGHPKLPTEKAAKWEN 120
a4       IRHGGGVDPGTGRPSS-----VRLWSPQASVKE- 88
          *****                               :* : :* : *

A10      LGSTGTDKRCRYEKRPYGSTSDPLLRLHQLQETIYITKRLRKKLCLRGAREL 174
G16      LGSTGTDKRCRYEKRPYGSTSDPLLRLHQLQETIYITKRLRKKLCLRGAREL 174
a4       -----GSEVGKLGELWHR--QALLTRKKALWIDL----- 115
          ** . * . * * : * : . * * . *

```

**Red**: RIN4, pathogenic type III effector avirulence factor Avr cleavage site

Fig. S4 Amino acid sequence alignment of predicted ORFs of A10, a4 and G16. Alignment was performed using ClastalW 2.1.
