# Supplementary material for: Identification of candidate genes responsible for the susceptibility of apple (Malus × domestica Borkh.) to Alternaria blotch
Source: PubMed Central journal article supplement (PMC6454750; doi:10.1186/s12870-019-1737-7), 2019-04-08
Supplement: 12870_2019_1737_MOESM7_ESM.pdf [file 12870_2019_1737_MOESM7_ESM.pdf]

Table S3 Presence of the 12-bp insertion among founders and old cultivars

| Cultivars                | Sympton scores of <i>A. alternata</i> apple pathotype inoculation test <sup>a</sup> | Presence of the 12-bp insertion | Origin         |         |
|--------------------------|-------------------------------------------------------------------------------------|---------------------------------|----------------|---------|
| Starking Delicious       | 3.9                                                                                 | +                               | USA, 1800s     | Founder |
| Jonathan                 | 0                                                                                   | -                               | USA, 1800s     | Founder |
| Golden Delicious         | 0.8                                                                                 | -                               | USA, 1800s     | Founder |
| Ralls Janet              | 1.2                                                                                 | -                               | USA, 1800s     | Founder |
| Worcester Pearmain       | 0                                                                                   | -                               | USA, 1800s     | Founder |
| Indo                     | 4.1                                                                                 | +                               | Japan, 1800s   | Founder |
| Cox's Orange Pippin      | Resistant <sup>b</sup>                                                              | -                               | UK, 1800s      | Founder |
| McIntosh                 | 0.2                                                                                 | -                               | Canada, 1800s  | Founder |
| Alexander                | 0.0                                                                                 | -                               | Ukraine, 1700s |         |
| American Summer Pearmain | 0.0                                                                                 | -                               | USA, 1800s     |         |
| Baldwin                  | 3.2                                                                                 | +                               | USA, 1700s     |         |
| Ben Davis                | 0.0                                                                                 | -                               | USA, 1800s     |         |
| Benfle                   | 0.0                                                                                 | -                               | Unknown, ?     |         |
| Blue Pearmain            | 0.2                                                                                 | -                               | USA, 1800s     |         |
| Bramley's Seedling       | 3.2                                                                                 | +                               | UK, 1800s      |         |
| Calville Rouge           | 3.0                                                                                 | +                               | France?, ?     |         |
| Carolina Red June        | 0.0                                                                                 | -                               | USA, 1800s     |         |
| Cogswell                 | 1.4                                                                                 | -                               | USA, 1700s     |         |
| Duchess of Oldenburg     | 0.0                                                                                 | -                               | Russia, 1700s  |         |
| Early Harvest            | 0.2                                                                                 | -                               | USA, 1800s     |         |
| Early Joe                | 4.2                                                                                 | +                               | USA, 1800s     |         |
| Early Strawberry         | 4.2                                                                                 | +                               | USA, 1800s     |         |
| Esopus Spitzenburgh      | 3.8                                                                                 | +                               | USA, 1700s     |         |
| Fameuse                  | 0.0                                                                                 | -                               | Canada, 1700s  |         |
| Gravenstein              | 0.0                                                                                 | -                               | Denmark, 1600s |         |
| Jersey Sweet             | 0.2                                                                                 | -                               | USA, 1800s     |         |
| King of Tompkins         | 3.2                                                                                 | +                               | USA, 1800s     |         |
| Northern Spy             | 4.0                                                                                 | +                               | USA, 1800s     |         |
| Orange Pippin            | 0.2                                                                                 | -                               | UK, 1700-1800s |         |
| Porter                   | 3.4                                                                                 | +                               | USA, 1800s     |         |
| Prinzen Apfel            | 0.0                                                                                 | -                               | Germany, 1700s |         |
| Rome Beauty              | 0.0                                                                                 | -                               | USA, 1800s     |         |
| Roxbury Russet           | 0.2                                                                                 | -                               | USA, 1600s     |         |
| Sops of Wine             | 0.2                                                                                 | -                               | UK, 1800s      |         |
| Summer Queen             | 3.0                                                                                 | +                               | USA, 1800s     |         |
| Swaar                    | 3.8                                                                                 | +                               | USA, 1800s     |         |
| Tallman's Sweet          | 0.2                                                                                 | -                               | USA, 1800s     |         |
| Twenty Ounce             | 0.2                                                                                 | -                               | USA, 1800s     |         |
| Wagener                  | 2.2                                                                                 | -                               | USA, 1700s     |         |
| Wealthy                  | 0.0                                                                                 | -                               | USA, 1800s     |         |
| White Winter Pearmain    | 4.2                                                                                 | +                               | USA, 1800s     |         |
| Winesap                  | 0.4                                                                                 | -                               | USA, 1800s     |         |
| York Imperial            | 0.8                                                                                 | -                               | USA, 1800s     |         |

<sup>a</sup>Adopted from Abe et al. [15].

<sup>b</sup>No visible symptom by Tsuchiya et al. [34]
